# Supplementary material for: Electronic effect of terminal acceptor groups on different organic donor–acceptor small-molecule based memory devices
Source: Royal Society of Chemistry journal article supplement (doi:10.1039/c4cp02157f), 2014-01-01
Supplement: c4cp02157f1.pdf [file c4cp02157f1.pdf]

## Electronic Supplementary Information

# Electronic Effect of Terminal Acceptor Groups on Organic Donor-Acceptor Small-Molecule Induced Different Memory Models

Haifeng Liu<sup>a</sup>, Hao Zhuang<sup>a</sup>, Hua Li,<sup>\*a</sup> Jianmei Lu<sup>\*a,b</sup> and Lihua Wang<sup>a</sup>

<sup>a</sup> College of Chemistry, Chemical Engineering and Materials Science, Collaborative Innovation Center of Suzhou Nano Science and Technology, Soochow University, Suzhou 215123, China. Fax: +86 512 65880367; Tel: +86 512 65880368; E-mail: lujm@suda.edu.cn.

<sup>b</sup> State Key Laboratory of Treatments and Recycling for Organic Effluents by Adsorption in Petroleum and Chemical Industry, Suzhou 215123, P. R. China.

### 1. NMR Spectra.

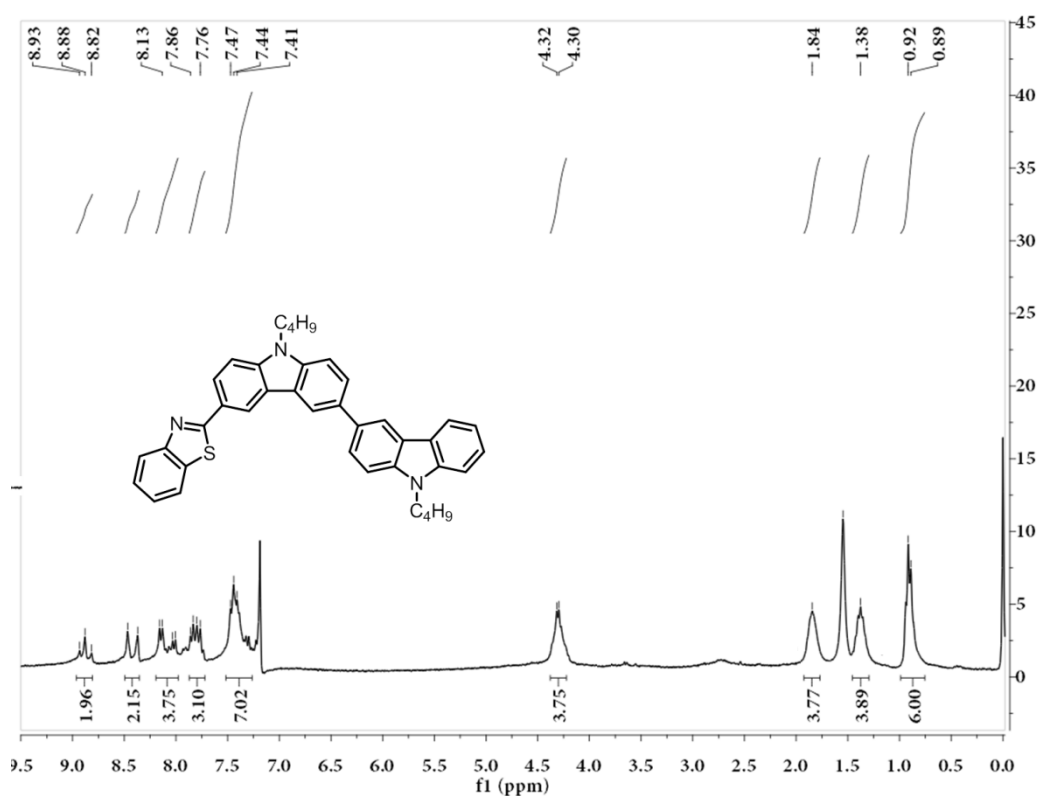

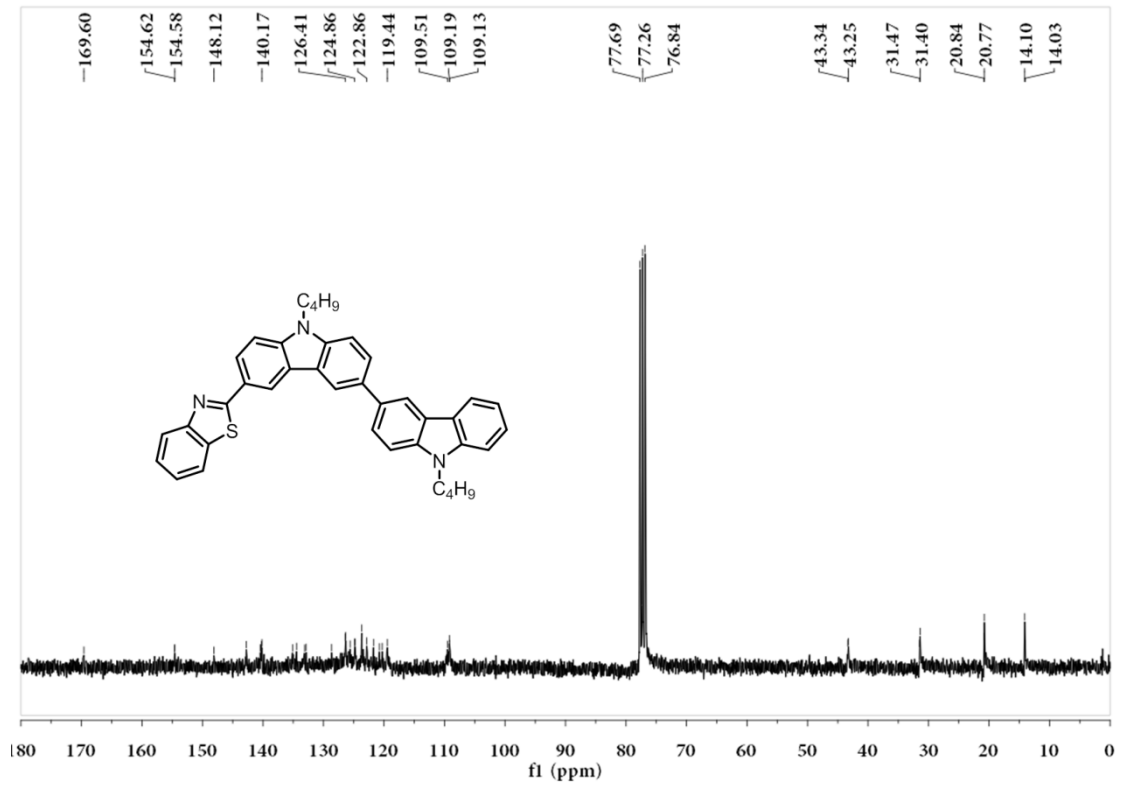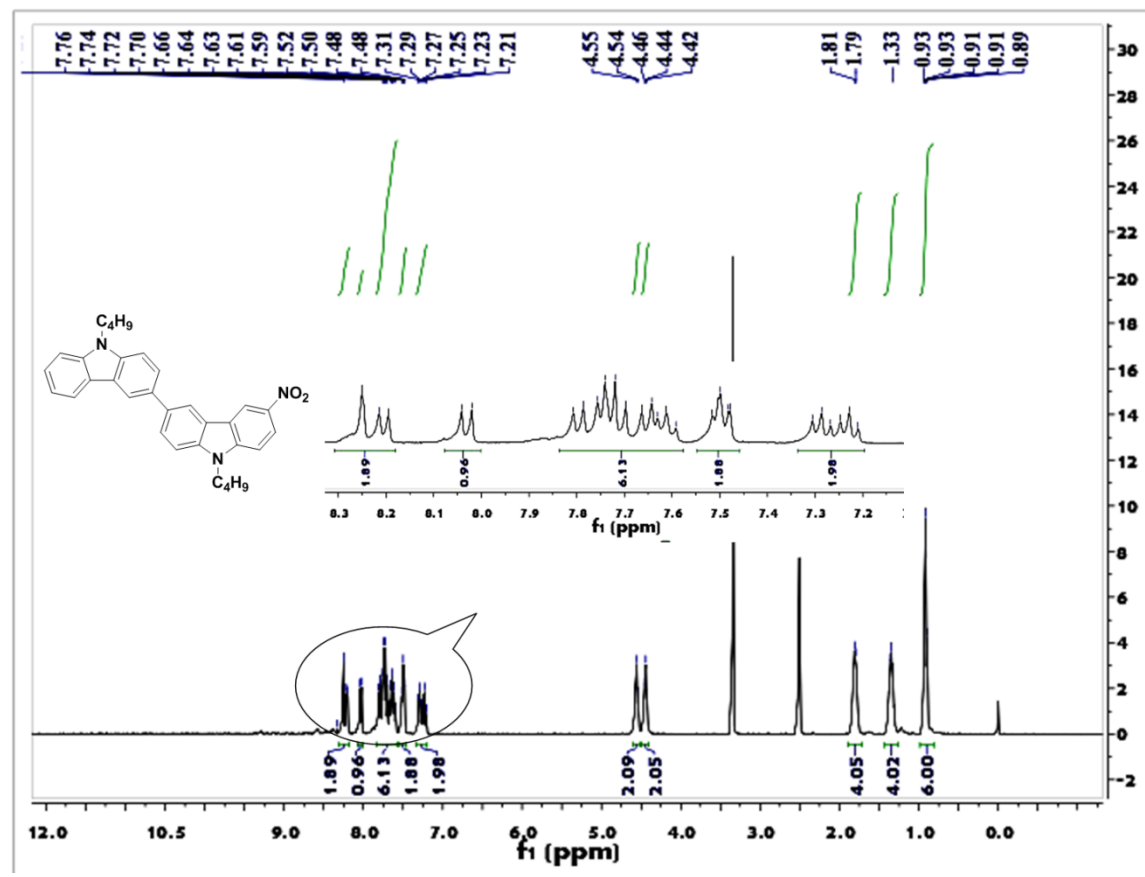

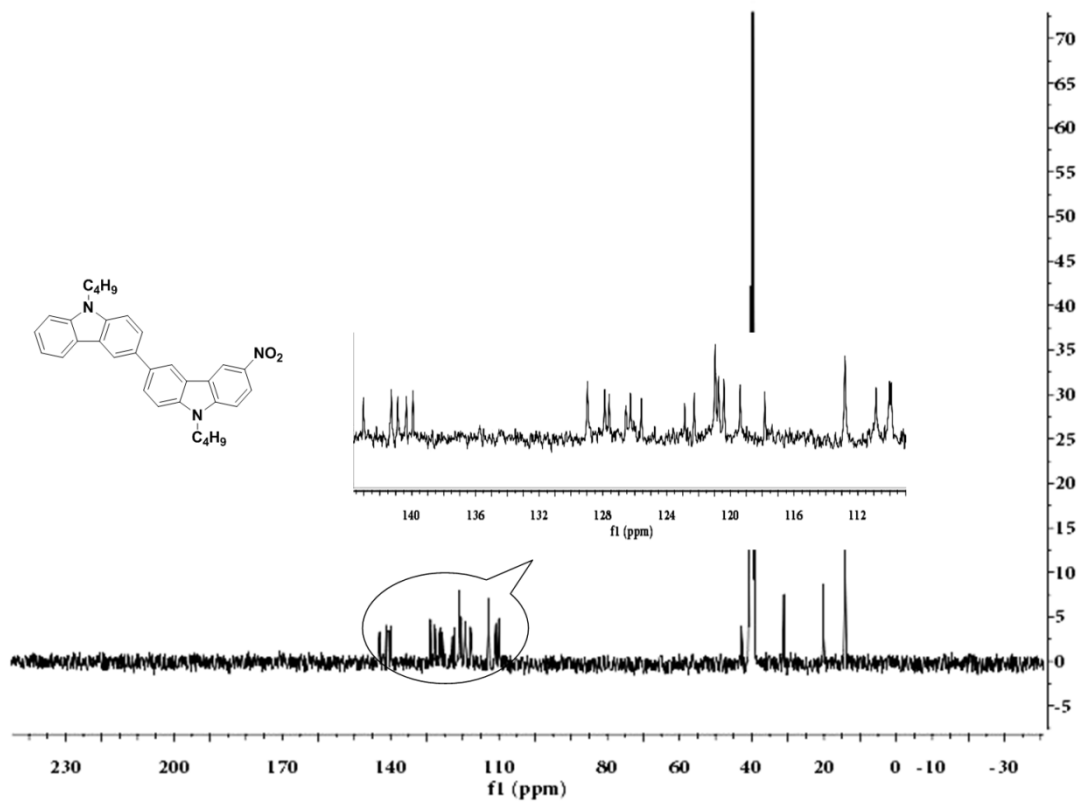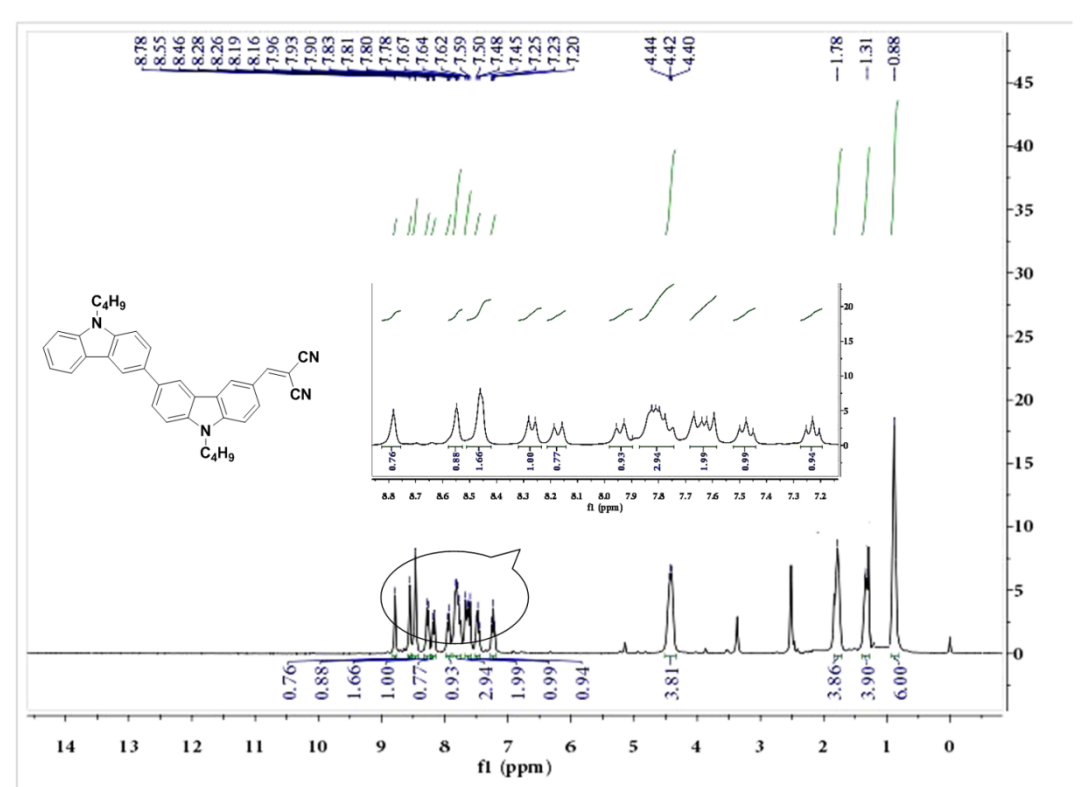

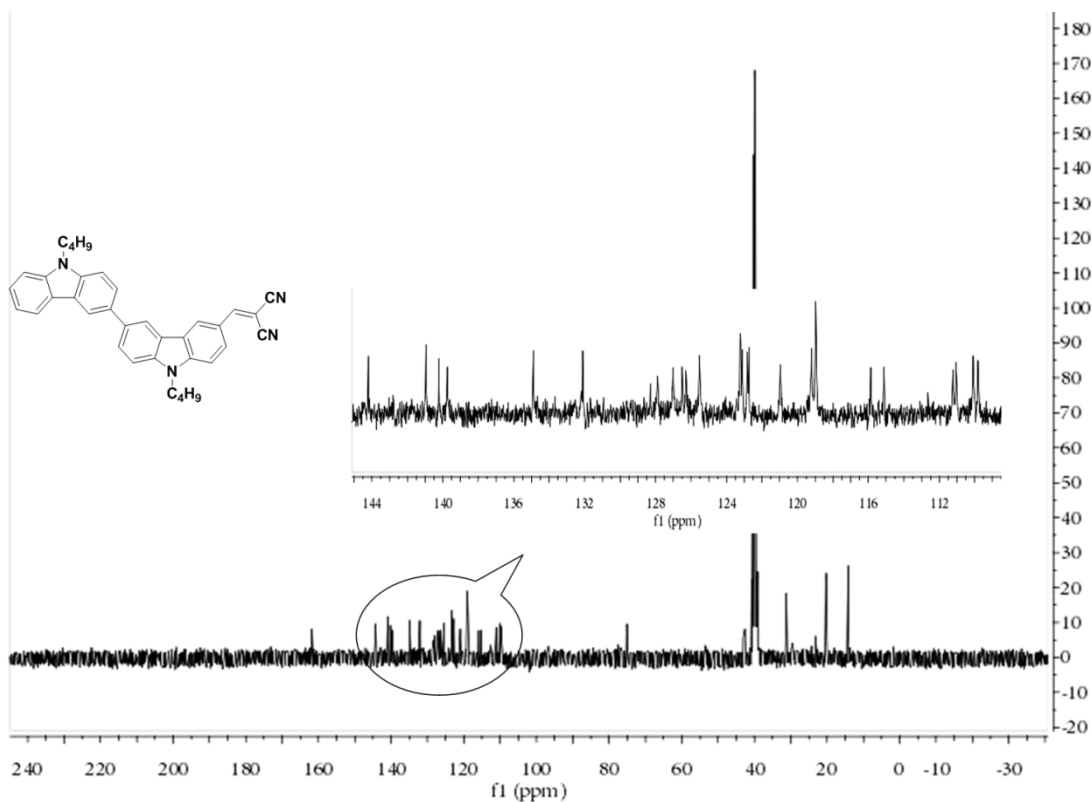

Figure S1  $^1\text{H}$  and  $^{13}\text{C}$  NMR spectra of BCz-BT, BCz-NO<sub>2</sub> and BCz-CN

## 2. Thermo gravimetric analysis (TGA).

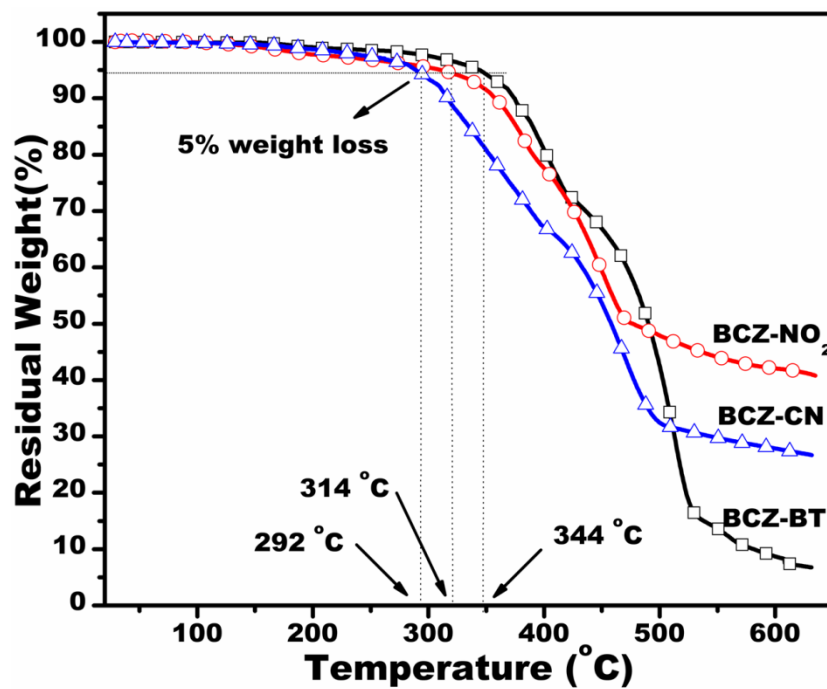

Figure S2 Thermo gravimetric analysis (TGA) curves of three compounds with a heating rate of 20 C min<sup>-1</sup> under nitrogen atmosphere.

### 3. I/t Curves.

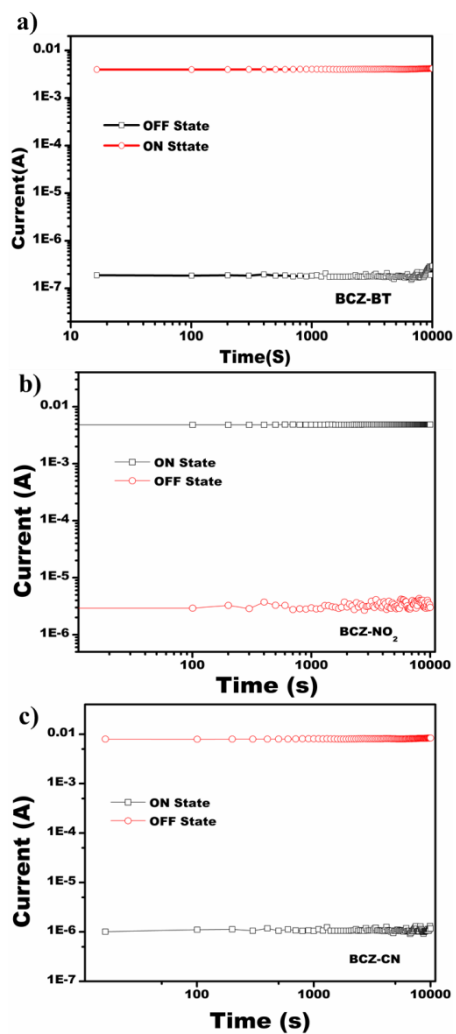

Figure S3 Effect of retention time at 1.0 V on OFF and ON states of BCz-BT, BCz-NO<sub>2</sub> and BCz-CN under a constant stress of 1.0 V.

### 4. I/V Curves of ITO/BCz/Al.

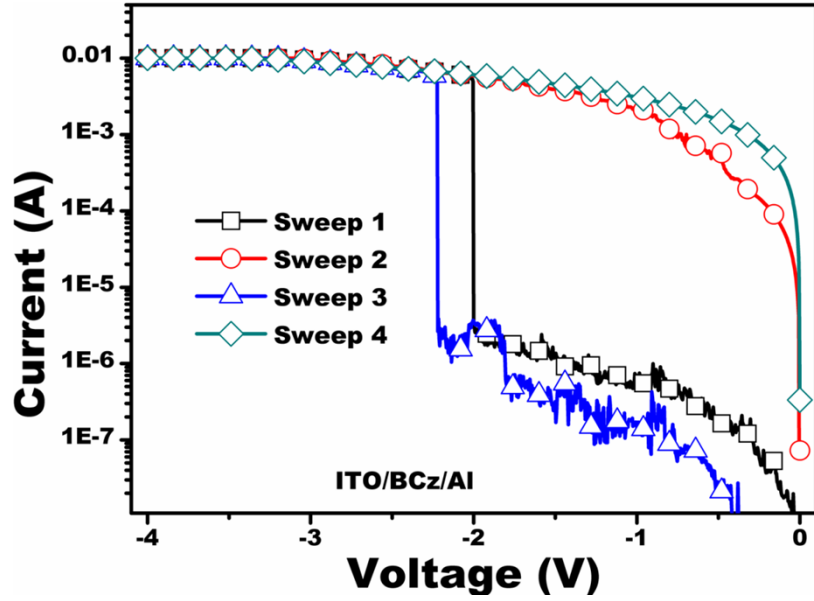

Figure S4 The memory performance of the ITO/BCz/Al device

## 5. Current models.

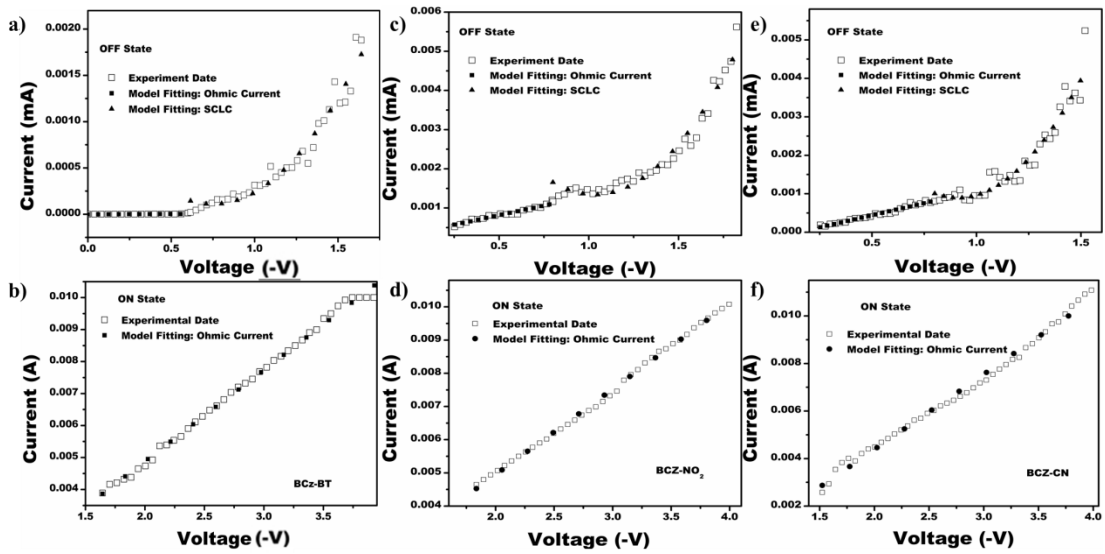

Figure S5 OFF and ON states I-V curves of the experimental and fitted data for the memory devices based on **BCz-BT**, **BCz-NO<sub>2</sub>** and **BCZ-CN** of: (a, b, c) The OFF state with the Ohmic current and SCLC model; (b, d, f) The ON state with the ohmic current model.
